# Supplementary material for: Disruption of stromal hedgehog signaling initiates RNF5-mediated proteasomal degradation of PTEN and accelerates pancreatic tumor growth
Source: Life Sci Alliance. 2018 Oct 26;1(5):e201800190. doi: 10.26508/lsa.201800190 (PMC6238420; doi:10.26508/lsa.201800190)
Supplement: Supplementary file 1 [file LSA-2018-00190_TableS1.xlsx]

## Sheet: Sheet1
(A)
All Patients (univariate)
PTEN Score	Total Patients	Dead	Survived	Median Survival	p-value	Hazard Ratio
High	59	51	8	506	0.017	1.79
Low	27	25	2	263
Total	86	76	10
All Patients (multivariate)
Varible	p-value	Hazard Ratio
PTEN Score	0.052	1.77
Node Negative Status	0.239	1.43
Age	0.148	0.67
Tumor Differentiation	0.935	1.02
Lympho Vascular Invasion	0.033	1.75
(B)
Patients ≤60 (univariate)
PTEN Score	Total Patients	Dead	Survived	Median Survival	p-value	Hazard Ratio
High	18	15	3	488	0.609	1.28
Low	7	6	1	426
Total	25	21	4
Patients ≤60 (multivariate)
Variable	p-value	Hazard Ratio
PTEN Score	0.663	1.3
Node Negative Status	0.127	3.31
Tumor Differentiation	0.984	0.99
Lympho Vascular Invasion	0.65	1.26
(C)
Patients >60 (univariate)
PTEN Score	Total Patients	Dead	Survived	Median Survival	p-value	Hazard Ratio
High	41	36	5	506	0.003	2.37
Low	18	18	0	242
Total	59	54	5
Patients >60 (multivariate)
Variable	p-value	Hazard Ratio
PTEN Score	0.022	2.15
Node Negative Status	0.943	1.03
Tumor Differentiation	0.874	1.06
Lympho Vascular Invasion	0.016	2.12
