# Supplementary material for: Disruption of stromal hedgehog signaling initiates RNF5-mediated proteasomal degradation of PTEN and accelerates pancreatic tumor growth
Source: Life Sci Alliance. 2018 Oct 26;1(5):e201800190. doi: 10.26508/lsa.201800190 (PMC6238420; doi:10.26508/lsa.201800190)
Supplement: Supplementary file 2 [file LSA-2018-00190_TableS2.xlsx]

## Sheet: Sheet1
	All patients	PTEN High	PTEN Low
N	86	59	27
Median age at surgery (range),years	66(44-87)	65.5(44-82)	68(46-87)
Median survival (range),days	402(10-2933)	453(10-2670)	300 (72-2933)
Median primary tumor diameter (range),cm	3.8(1.5-8)	3.8(1.5-8)	4(1.9-6.4)
Sex
Male	51	36	15
Female	35	23	12
Adjuvant Radiation Therapy
Yes	8	5	3
No	33	22	11
Unknown	45	32	13
Adjuvant Chemotherapy
Yes	16	11	5
no	29	20	9
Unknown	41	28	13
TNM Stage
T3N0	19	13	6
T3N1	56	36	20
T2N0	3	3	0
T2N1	6	6	0
T1N0	0	0	0
T1N1	1	1	0
Unknown	1	0	1
AJCC Stage
Stage 4	0	0	0
Stage 3	2	1	1
Stage2B	56	40	16
Stage2A	15	10	5
Stage1B	3	3	0
Stage1A	1	1	0
Stage0	1	0	1
Unknown	8	4	4
Neural Invasion
Yes	76	52	24
No	6	5	1
Unknown	4	2	2
Lymphovascular Invasion
Yes	39	26	13
No	38	27	11
Unknown	9	6	3
Differentiation
Well/Mod	54	35	19
Poor	32	24	8
Unknown	0	0	0
