# Supplementary material for: Disruption of stromal hedgehog signaling initiates RNF5-mediated proteasomal degradation of PTEN and accelerates pancreatic tumor growth
Source: Life Sci Alliance. 2018 Oct 26;1(5):e201800190. doi: 10.26508/lsa.201800190 (PMC6238420; doi:10.26508/lsa.201800190)
Supplement: Supplementary file 3 [file LSA-2018-00190_TableS3.xlsx]

## Sheet: Sheet1
Official Symbol	Mean Signal Intensity	Diff
SLC9A3R1	189.3	1.6
TAX1BP3	152.4	2.6
DLG3	82.4	5.9
SNTA1	76.2	1
TRIM44	50.5	0.5
HSPE1	48.7	2.6
DDX19B	47.6	0.5
TNNT2	44.2	0.2
COL9A1	43.4	0.2
FOLR1	36.9	0.1
DLG4	34.7	2.4
APLF	34.1	1.2
C9orf169	33.4	1.2
DNMT3A	33.2	0.4
APTX	31.4	0
LIN7B	31.2	1.9
TSTD2	27.8	2
EAF2	26.6	0.6
KCNAB2	26.2	4.2
SNCA	25.2	0.4
TRUB1	24.2	4.1
SMAD3	23.4	1.1
SPIN2B	22.9	0.1
EAF1	22.5	2
CCT3	22.4	0.5
TWF2	21.7	0.5
RAB28	20.7	3.3
EXOSC1	20.1	0.8
SPRR3	19.9	0
MYL6B	19.2	0.8
EIF3G	19.1	0.2
ARG1	19	0
ANTXR1	19	0.8
BDH2	18.8	0.1
CARD14	18.5	0.4
LTF	17.9	1.3
UFSP2	17.8	0.4
FAM9C	17.5	0.7
PTENP1	17.2	0.2
PIN1	17	0.1
PPP1R2	16.3	0.1
UBD	16.1	0.8
HSPA1L	16	0.8
MFAP3L	15.6	0.9
CRBN	15.5	0.1
ACOT9	15.4	1.1
ABR	15.3	0
C21orf91	15.2	1.1
HOMER3	15.2	0.2
VCY	15	0.2
SSX2	14.9	0.6
SPEG	14.9	0.6
DPH2	14.7	0.2
C8orf40	14.7	0.3
GGH	14.5	0.7
KCNAB1	14.5	0.7
CASQ1	14.5	0
NMRAL1	14.4	0.7
ALDH3B1	14.2	0.5
DDX41	14.1	0.3
FHL3	14	0.2
SH3YL1	13.9	0.3
SAE2	13.9	1.1
MGMT	13.7	1.6
TWSG1	13.7	1.9
ILKAP	13.5	1.4
GMDS	13.4	0.2
SHMT1	13.2	0.3
TMEM59	13.1	6.9
GOPC	13	0.5
PAPSS2	13	1.4
CROT	13	0.5
MAGEC2	13	0
TDP1	13	0.6
LYPLAL1	12.9	0.5
CRIP2	12.9	0.2
AGPAT1	12.9	0.2
GTF2IRD2	12.8	1.1
TCTN2	12.8	0.3
C9orf150	12.8	0.2
TMPRSS4	12.7	0.3
MT1F	12.7	0.1
PFKP	12.6	0.2
EFHD2	12.5	0
TCF4	12.5	0.3
RBFA	12.5	0.1
C10orf81	12.5	0.6
MGC23270	12.4	0.1
MPPED2	12.3	0
ZNF428	12.3	0.6
C10orf32	12.2	0
MRPS36	12.2	0.3
PTPN2	12.1	0.3
MBP	12.1	0
DNAJB4	11.9	0.6
FAM60A	11.9	0.4
MT1H	11.9	0.1
TSSK3	11.8	0.2
COX19	11.8	0.6
ECE2	11.7	0.2
BEND5	11.7	0.1
ZNF280D	11.7	0.3
DUSP22	11.7	0.4
SDS	11.6	0.2
SCFD1	11.6	0.7
LZTFL1	11.6	0.1
CSRP3	11.5	0.1
CT45A3	11.5	1.1
PSMA3	11.5	0.2
CLEC18C	11.5	0.3
CKS1B	11.5	0.2
HSH2D	11.4	0.1
RASSF9	11.4	0.1
SSX3	11.3	1.5
KBTBD7	11.3	0
CARS	11.3	0.2
ACYP1	11.3	0.9
ACD	11.2	1.1
PPP2R1B	11.2	0.2
FABP5	11.2	0
LYSMD2	11.2	0.3
C18orf25	11.2	0
ERI1	11.1	0.2
C16orf57	11.1	0.5
MRPS35	11.1	0.1
FKBP5	11.1	0.2
GINS2	11	0.1
CCT7	11	0.3
LOC133874	10.9	0.1
CDKN2B	10.9	0.9
MAGEA4	10.9	0.1
NFKBIB	10.9	0.3
AKT1S1	10.9	0.6
FAM92A3	10.9	0
C12orf44	10.9	0
AVL9	10.9	0.4
TUBA1B	10.8	0
SEC22C	10.8	0.3
CDCA3	10.8	0.2
ATP6V1E1	10.8	0.4
IL8	10.7	0.3
NF2	10.7	0
RAD51	10.7	0.2
RNF5	10.7	0.1
PHLDA1	10.7	0.8
APOPT1	10.6	0.1
DPCD	10.6	0
C12orf60	10.6	0.5
WBP2	10.6	1.1
SH3BGRL3	10.6	0.5
CAST	10.5	0.4
LOC554202	10.5	0.2
TAGLN	10.5	0.9
UGGT2	10.5	0.1
PDLIM3	10.5	0.2
ASL	10.5	0.1
ELOVL2	10.4	0.1
C14orf93	10.4	0.2
NCALD	10.4	1.3
CITED1	10.4	0.5
TNFRSF14	10.4	0.6
CHURC1	10.4	0.5
GLRX5	10.4	0.4
CDK5RAP1	10.4	0.9
RIMBP2	10.4	0.1
UBE2E2	10.3	0.1
C19orf33	10.3	0
FAM107A	10.2	0.4
DCTN2	10.2	0.3
ACAA1	10.2	0.2
PDIA6	10.2	0.3
CORO6	10.2	0.5
CDC26	10.1	0.1
ESR2	10.1	0
DEPDC1B	10.1	0.4
MED29	10	0.3
ADH6	10	0.9
OTUD7B	10	0.3
FAM86A	10	0.1
GSTM3	10	0.1
EP400	10	0
CHAC2	9.9	0.2
HS3ST1	9.9	0.4
ZNF691	9.9	0.3
ALKBH7	9.9	0.2
MYL4	9.9	0.8
ANXA2	9.9	0.7
SCIN	9.9	0.5
C9orf86	9.8	0.4
ADH1B	9.8	0.1
MAOA	9.8	1.3
EGLN2	9.8	0.1
UFM1	9.8	0.1
DCTN6	9.8	0.9
OPTN	9.8	0.1
MAGEB1	9.7	0.1
SPOCK1	9.7	0.1
DUSP6	9.7	0
SUGT1	9.7	0.1
C2orf62	9.7	0.3
PGK1	9.7	0.1
IGL@	9.7	0
PTS	9.7	0.2
EIF2S2	9.6	0.5
C9orf142	9.6	0.5
MCM7	9.6	0.3
VASH1	9.6	0.4
TRAF3IP2	9.6	0.6
HN1L	9.6	0.2
PSMA4	9.6	0
LIN7A	9.5	0.5
KLC3	9.5	0.1
GCK	9.5	0.1
DYNC2LI1	9.5	0
SDF4	9.5	0
HPCA	9.5	0.6
SSH1	9.5	0.6
TRMT12	9.4	0.3
C10orf47	9.4	0.2
ALKBH8	9.4	0.2
SPARC	9.4	0.5
CAPN6	9.4	0.3
PRPF40A	9.4	0.2
TAF10	9.3	0.9
OR8D4	9.3	0.2
BNIP2	9.3	0.7
RPS6KB1	9.3	1.3
ICAM3	9.3	0
IDH3A	9.3	0
LEPREL1	9.3	0.3
ING3	9.2	0.6
WISP2	9.2	0.9
ARL8A	9.2	0.3
AMPD2	9.2	0.5
IDH1	9.2	0.2
CHEK2	9.2	0.3
PDCD4	9.2	0
ZNF554	9.2	0.3
C1orf213	9.2	0.2
PSMA8	9.1	0.1
APOBEC2	9.1	0.1
IFT81	9.1	0.9
U2AF1L4	9.1	0.1
NCAPH	9.1	0.3
PLCD1	9.1	0.2
KIAA1683	9	0.2
MAPK1	9	0.2
DTNA	9	0.2
QKI	9	0.4
SIRT5	9	0.3
MRPL55	9	1.2
SIK1	9	1.2
STRAP	9	0.2
SNX2	8.9	0.1
CMTM1	8.9	0.7
DCAF6	8.9	0.1
PRUNE2	8.9	1.2
ZNF625	8.9	0.3
LDOC1L	8.9	0.6
UNC45A	8.9	0.2
BCCIP	8.9	0.3
NUMB	8.8	0.1
CD48	8.8	0.9
SLC35A5	8.8	0.7
METTL1	8.8	0.1
S100B	8.8	0.4
DYNLRB2	8.8	0
CDC16	8.8	0.1
CSRP2	8.8	0.6
MYL3	8.8	0.3
EPB41L4A	8.8	0.3
CBS	8.7	0.1
ATAT1	8.7	0.1
FKBP1A	8.7	0.2
DUSP23	8.7	0
C16orf3	8.7	0.4
EIF2B5	8.7	0.4
PTRH2	8.7	0.3
UBE2A	8.7	0
CNOT7	8.7	0.2
AGFG1	8.7	0.2
TCAP	8.6	0.1
CTNNA3	8.6	0.3
LMOD3	8.6	0.2
SNRPA	8.6	0.2
KIAA0907	8.6	0.2
LOC492303	8.6	0.3
ELL3	8.6	0.3
RTN4	8.6	0.9
FKBP9L	8.6	0.5
CRNN	8.6	0
HPRT1	8.5	0.3
TRA2B	8.5	0.1
P4HTM	8.5	0.1
SSBP1	8.5	0.1
GDPD5	8.5	0.4
MAPK7	8.5	0.1
POLR2D	8.5	0.5
MMADHC	8.5	0.6
DAD1	8.5	0.2
LOC388882	8.4	0.7
TBC1D21	8.4	0.1
AK2	8.4	1.2
ATG4B	8.4	0.1
C17orf75	8.4	0.2
PLCG2	8.4	0.1
CYCS	8.4	0.1
ATPBD4	8.4	0.1
CMBL	8.4	0.8
PNKP	8.3	0
ARFRP1	8.3	0
PELI2	8.3	0.2
CLCF1	8.3	0.2
TCL1B	8.3	0.1
CALHM1	8.3	0.7
ZFYVE19	8.3	0.1
NPM3	8.3	0.1
TOR1AIP1	8.3	0.3
C7orf31	8.3	1.1
SMNDC1	8.3	0.1
MYOT	8.3	0.7
PPP3R1	8.3	0.4
HSD17B8	8.3	0
AMD1	8.3	0
PLEK2	8.3	0.1
OR12D2	8.3	0.5
RGS1	8.3	0.8
NEK3	8.2	0.2
NEK11	8.2	0.1
ZMYM5	8.2	0.7
TFAP2B	8.2	0.1
SCO2	8.2	0.5
PCCA	8.2	0.2
CDK9	8.2	0.2
KYNU	8.2	0.1
FKBP4	8.2	0.1
GAGE1	8.2	0.1
SENP8	8.2	0.2
FGF1	8.1	0.2
FAM118A	8.1	0.8
CETN1	8.1	0.5
MGC10814	8.1	0.2
MAPRE2	8.1	0
DIRAS2	8.1	0.6
CHDH	8.1	0.2
STK16	8.1	0.1
PTGS2	8.1	0.1
MYL5	8.1	0.3
ASB9	8.1	0.2
MAPK13	8.1	0.1
TPT1	8.1	0.2
PAICS	8.1	0.7
IGSF6	8.1	0.1
VPS29	8.1	0.4
HUS1	8.1	0.1
SNX8	8.1	0.1
CXorf48	8.1	0.1
EFCAB4B	8.1	1.5
WDR27	8.1	0.4
RAB34	8	0.1
WFDC3	8	0
GNAI2	8	0.1
CSNK2A1	8	0.1
RPL10A	8	0.2
ERCC8	8	1.2
UGDH	8	0
TCEAL1	8	0.4
LGMN	8	0.5
BCL6	8	0.3
KLK6	8	0.1
WWP2	8	0.1
INTS5	8	0
RXRA	8	0.3
GPR119	8	0.2
